# Supplementary material
Source: PubMed Central journal article supplement (PMC6643944)
Supplement: ao7b00314_si_001.pdf [file ao7b00314_si_001.pdf]

# Antimicrobial Activity Enhancement of Polyethersulfone Membranes by In-Situ Growth of ZnO Nanorods

*Muna H. Al-Hinai<sup>1,2</sup>, Priyanka Sathe<sup>2,3</sup>, Mohammed Z. Al-Abri<sup>1,2</sup>, Sergey Dobretsov<sup>3,4</sup>,  
Ashraf T. Al-Hinai<sup>5</sup>, Joydeep Dutta<sup>6\*</sup>*

<sup>1</sup>Department of Petroleum and Chemical Engineering, Sultan Qaboos University, PO Box 33, Al-Khoud, Muscat 123, Sultanate of Oman

<sup>2</sup>The Research Council Chair in Nanotechnology for Water Desalination, Sultan Qaboos University, PO Box 17, Al-Khoud, Muscat 123, Sultanate of Oman

<sup>3</sup>Department of Marine Science and Fisheries, Sultan Qaboos University, PO Box 34, Al-Khoud, Muscat 123, Sultanate of Oman

<sup>4</sup>Center of Excellence in Marine Biotechnology, Sultan Qaboos University, PO Box 50, Al-Khoud, Muscat 123, Sultanate of Oman

<sup>5</sup>Materials and Corrosion Department, Petroleum Development of Oman, PO Box 81, Muscat 100, Sultanate of Oman

<sup>6</sup>KTH Royal Institute of Technology, Functional Materials, Materials and Nanophysics-Applied Physics Department, SCI School, Isafjordsgatan 22, SE-164 40 Kista Stockholm, Sweden

\*Corresponding author Email: joydeep@kth.se

## Supporting Information

Table S 1 Viscosity calculated from slope of Shear stress-shear rate linear fitting of the curves

|                | NMP    | PES    | PES-2% ZnO | PES-4% ZnO |
|----------------|--------|--------|------------|------------|
| Slope (Pa.s)   | 0.0021 | 0.2713 | 0.5718     | 0.7281     |
| R <sup>2</sup> | 0.895  | 1      | 1          | 1          |
| Viscosity (cP) | 2.1    | 271.3  | 571.8      | 728.1      |

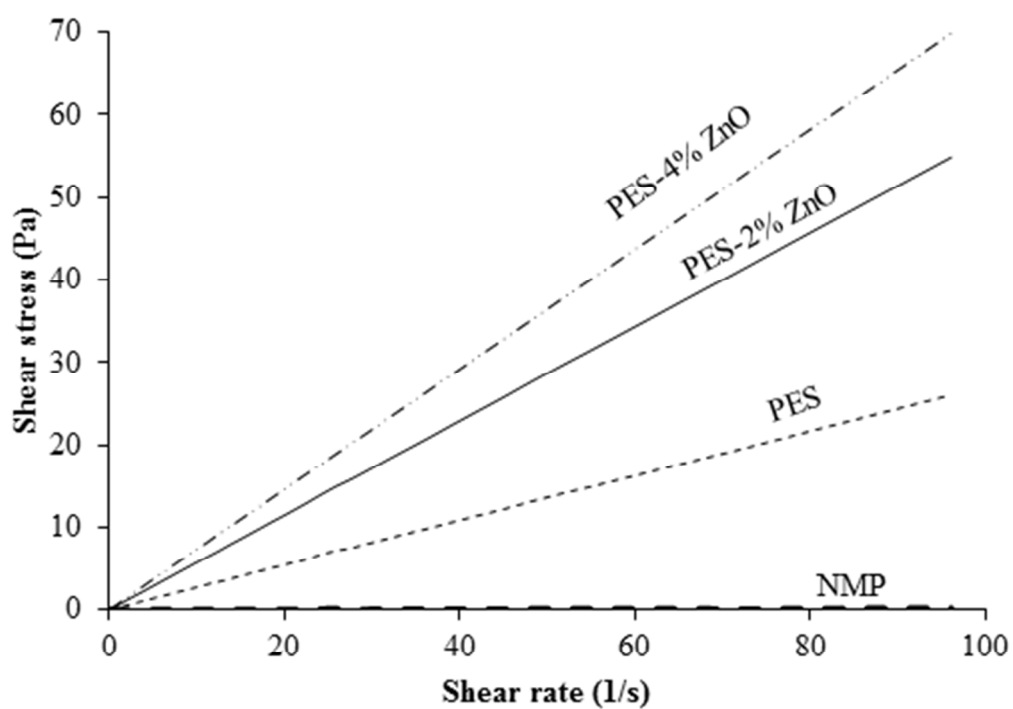

Figure S 1 Shear stress behavior with shear rate of the doped Zn-PES polymer solution and the solvent (NMP)

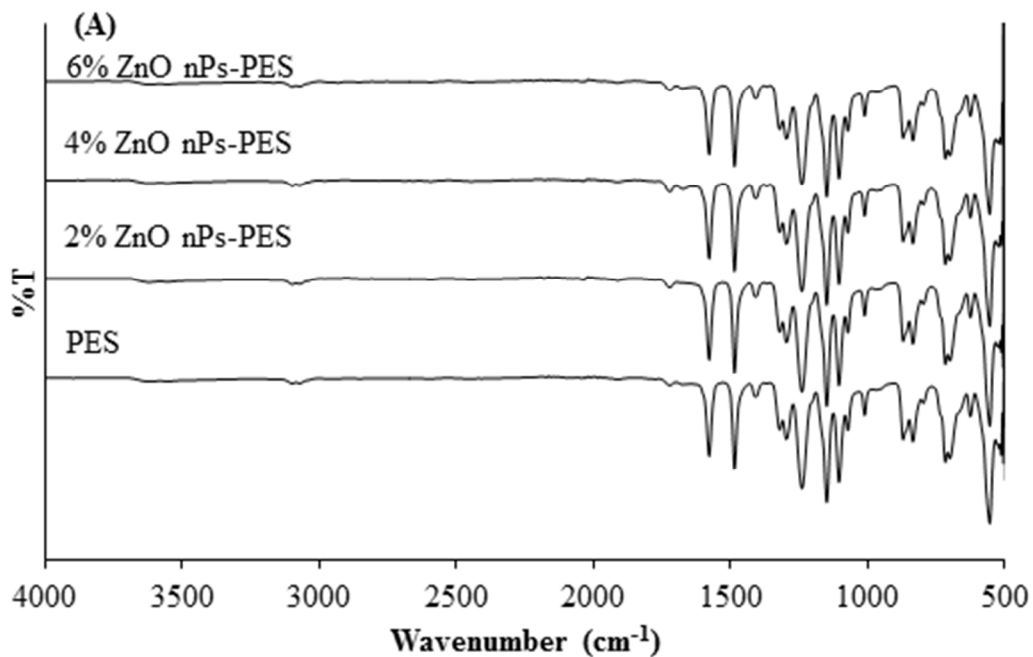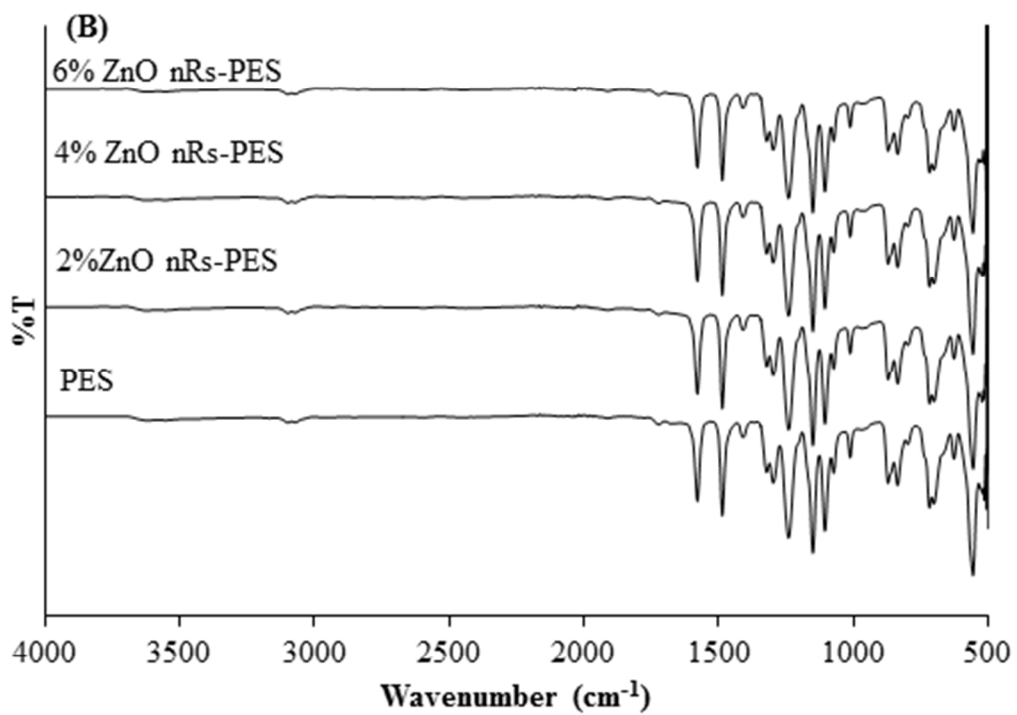

Figure S 2 ATR-FTIR spectra of (A) ZnO nanoparticles modified polyethersulfone membranes polyethersulfone and (B) ZnO nanorods modified polyethersulfone membranes

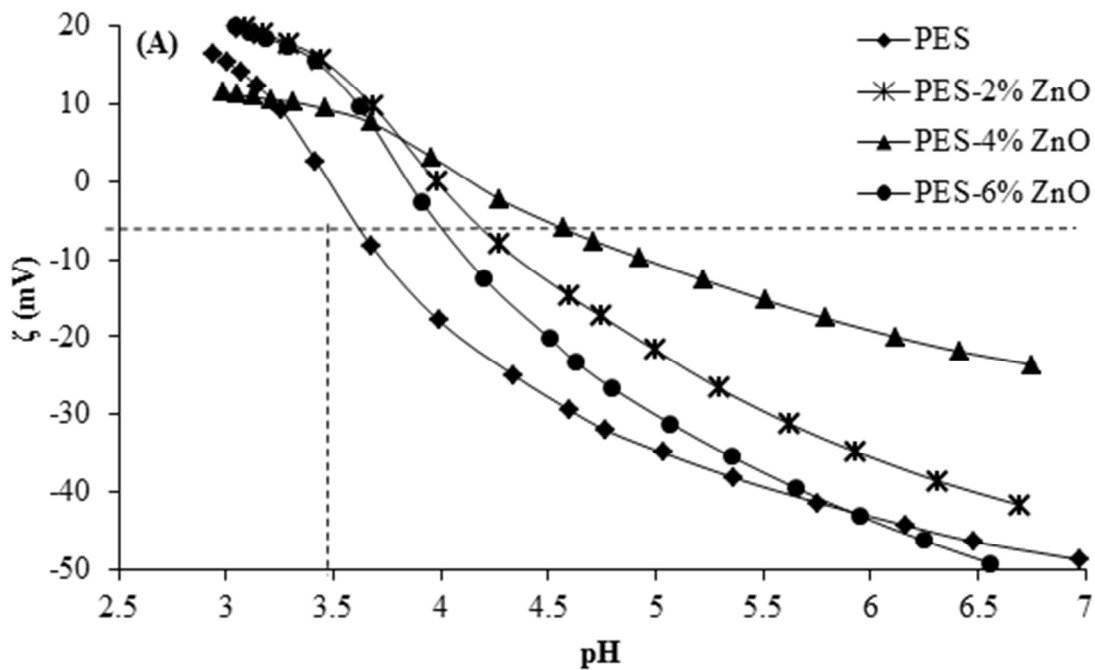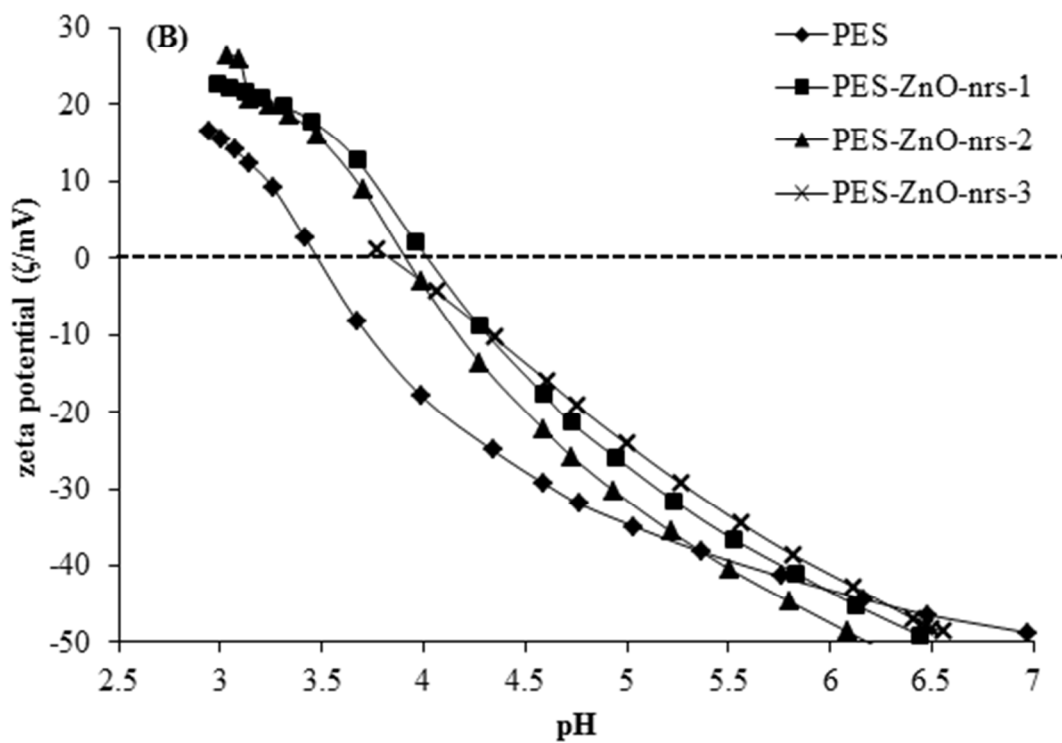

Figure S 3 Zeta potential of (A) polyethersulfone membranes blended with ZnO nanoparticles and (B) membranes modified with ZnO nanorods measured by titration with 0.05 M HCl(aq) for pH range 7-3

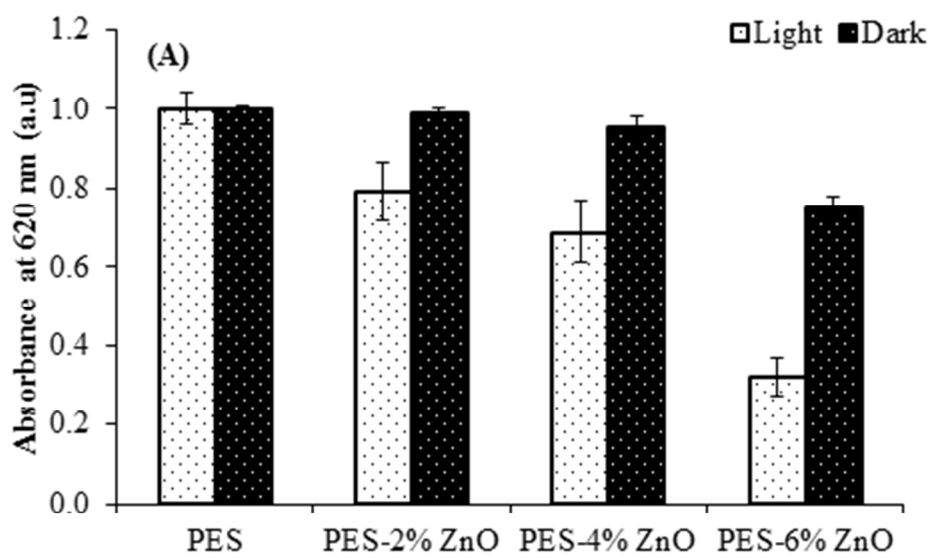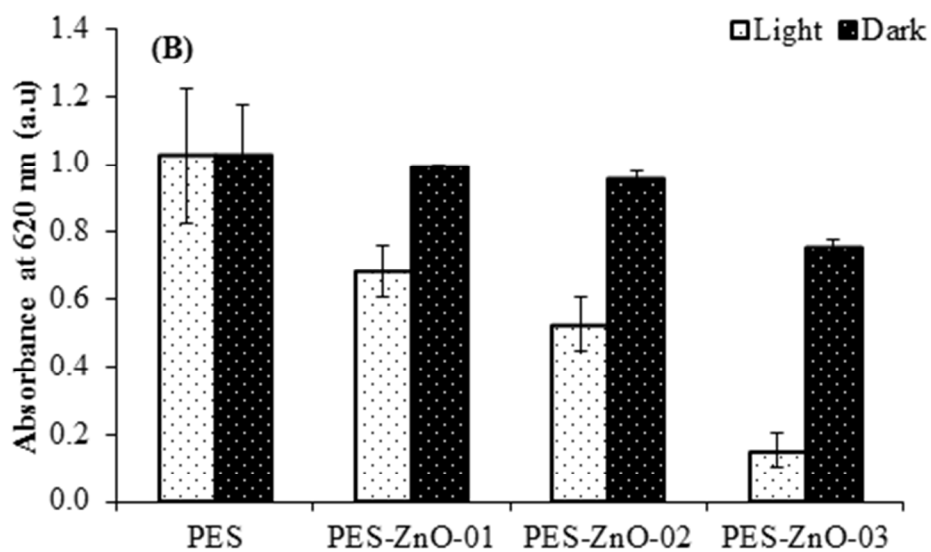

Figure S 4 The effect of ZnO NPs embedded in PES membranes (A) and ZnO NRs (B) in different concentrations in light ( $1,060\text{Wm}^{-2}$ ) or dark conditions (no irradiation) on *E.coli* bacterium after 5 h of photocatalysis
